# Supplementary material
Source: PubMed Central journal article supplement (PMC5210085)

## Expanded View Figures

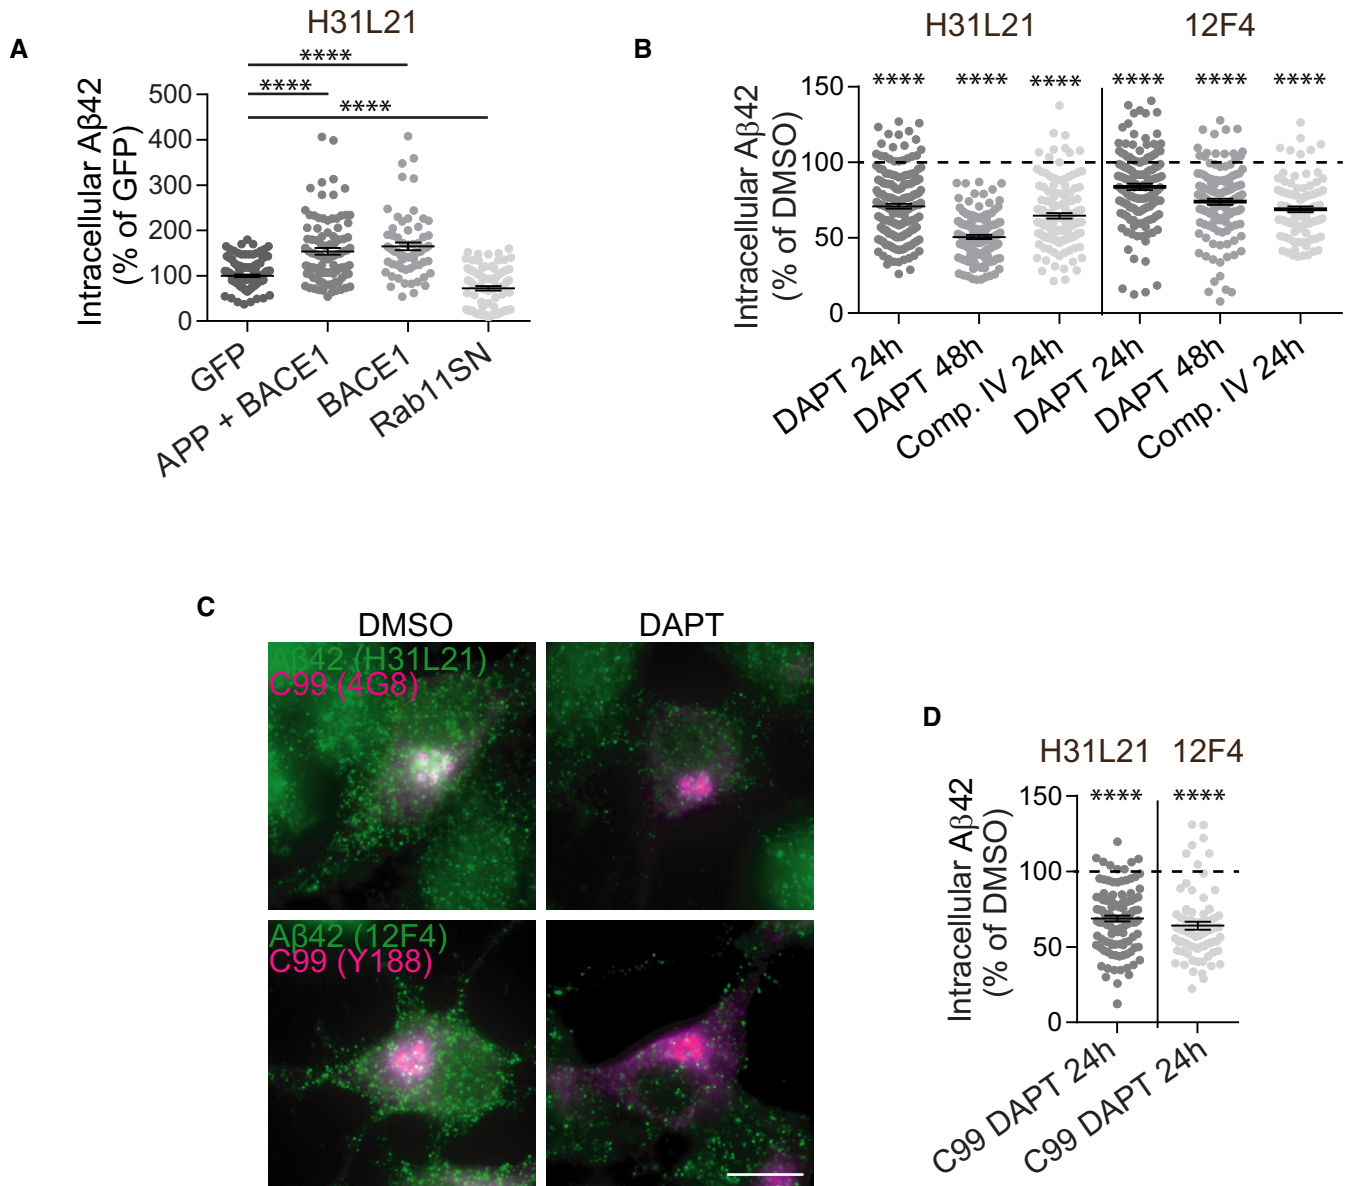

**Figure EV1. Validation of intracellular endogenous A $\beta$ 42 semi-quantitative assay.**

- A** Intracellular endogenous A $\beta$ 42 changes positively induced by overexpressing APP-RFP and BACE1-GFP or BACE1-GFP alone; or negatively induced by overexpressing Rab11SN, a dominant-negative mutant of Rab11 [89] in N2a cells immunolabelled with anti-A $\beta$ 42 (clone H31L21). Single-cell semi-quantitative analysis of A $\beta$ 42 immunofluorescence normalised to A $\beta$ 42 fluorescence intensity in GFP-transfected cells ( $n = 3-5$ ,  $N_{\text{GFP}} = 133$ ,  $N_{\text{APP + BACE1}} = 98$ ,  $N_{\text{BACE1}} = 65$ ,  $N_{\text{Rab11SN}} = 101$ ; \*\*\*\* $P < 0.0001$  vs. GFP, Mann-Whitney test, mean  $\pm$  SEM).
- B** Intracellular endogenous A $\beta$ 42 changes upon the indicated treatment with inhibitors of A $\beta$  generation, DAPT that blocks  $\gamma$ -secretase [90], or compound IV that blocks BACE1 [91], or their vehicle DMSO in N2a cells immunolabelled with anti-A $\beta$ 42 (clones H31L21 or 12F4). Single-cell semi-quantitative analysis of A $\beta$ 42 immunofluorescence normalised to A $\beta$ 42 fluorescence intensity in cells treated with DMSO ( $n = 2-3$ , H31L21:  $N_{\text{DMSO 24 h}} = 195$ ,  $N_{\text{DMSO 48 h}} = 145$ ,  $N_{\text{DAPT 24 h}} = 178$ ,  $N_{\text{DAPT 48 h}} = 128$ ,  $N_{\text{Comp. IV}} = 141$ , 12F4:  $N_{\text{DMSO 24 h}} = 243$ ,  $N_{\text{DMSO 48 h}} = 138$ ,  $N_{\text{DAPT 24 h}} = 139$ ,  $N_{\text{DAPT 48 h}} = 128$ ,  $N_{\text{Comp. IV}} = 97$ ; \*\*\*\* $P < 0.0001$  vs. DMSO,  $t$ -test, mean  $\pm$  SEM).
- C** Intracellular endogenous A $\beta$ 42 (green) and C99 (magenta) in N2a cells expressing C99 treated with DAPT or its vehicle DMSO, immunolabelled with anti-A $\beta$ 42 (clones H31L21 or 12F4 as indicated) and with anti-C-terminal APP (Y188 or 4G8), analysed by epifluorescence microscopy. Scale bar, 10  $\mu\text{m}$ .
- D** Intracellular endogenous A $\beta$ 42 changes upon expression of C99 and treatment with DAPT or its vehicle DMSO in N2a cells immunolabelled with anti-A $\beta$ 42 (clones H31L21 or 12F4). Single-cell semi-quantitative analysis of A $\beta$ 42 immunofluorescence normalised to A $\beta$ 42 fluorescence intensity in cells treated with DMSO ( $n = 3$ , H31L21:  $N_{\text{C99 + DMSO}} = 70$ ,  $N_{\text{C99 + DAPT}} = 116$ , 12F4:  $N_{\text{C99 + DMSO}} = 84$ ,  $N_{\text{C99 + DAPT}} = 80$ ; \*\*\*\* $P < 0.0001$  vs. C99 + DMSO,  $t$ -test, mean  $\pm$  SEM).

**Figure EV2. CD2AP and Bin1 knockdown efficiency, intracellular A $\beta$  and APP-CTFs levels upon DAPT treatment.**

- A Bin1 and CD2AP knockdown efficiency in siBin1-, siCD2AP- and siControl-treated neurons by Western blot analysis with anti-Bin1, anti-CD2AP and anti-tubulin as a loading control. The quantification of Bin1 and CD2AP levels normalised to tubulin levels is shown on the right ( $n_{\text{siBin1}} = 5$ , \*\*\*\* $P < 0.0001$ ,  $t$ -test, mean  $\pm$  SEM;  $n_{\text{siCD2AP}} = 3$ , \*\* $P = 0.075$ ,  $t$ -test, mean  $\pm$  SEM).
- B Bin1 and CD2AP knockdown efficiency in siBin1-, siCD2AP- and siControl-treated N2a cells by Western blot analysis with anti-Bin1, anti-CD2AP and anti-tubulin as a loading control. Quantification of Bin1 and CD2AP levels normalised to tubulin levels is shown on the right ( $n_{\text{siBin1}} = 3$ ; \* $P = 0.0137$ ,  $t$ -test, mean  $\pm$  SEM;  $n_{\text{siCD2AP}} = 3$ ; \*\* $P = 0.0028$ ,  $t$ -test, mean  $\pm$  SEM).
- C Intracellular endogenous A $\beta$ 42 immunolabelled with anti-A $\beta$ 42 (clone H31L21) in N2a cells treated with siBin1, siCD2AP or siControl alone or upon expression of the siRNA-resistant plasmids: CD2AP-GFP, neuronal Bin1 or ubiquitous Bin1 (right insets), analysed by epifluorescence microscopy. Scale bars, 10  $\mu\text{m}$ . The quantification of A $\beta$ 42 intensity per cell is shown on the right ( $n = 3$ ,  $N_{\text{siControl}} = 197$ ,  $N_{\text{siCD2AP}} = 208$ ,  $N_{\text{siCD2AP} + \text{CD2AP-GFP}} = 170$ ,  $N_{\text{siBin1}} = 186$ ,  $N_{\text{siBin1} + \text{neuronal Bin1}} = 117$ ,  $N_{\text{siBin1} + \text{ubiquitous Bin1}} = 203$ ; \*\*\*\* $P < 0.0001$  siCD2AP vs. siControl, siBin1 vs. siControl and siBin1 + ubiquitous Bin1 vs. siControl, ##### $P < 0.0001$  siCD2AP + CD2AP-GFP vs. siCD2AP and siBin1 vs. siBin1 + neuronal Bin1 and siBin1 + ubiquitous Bin1 vs. siBin1 + neuronal Bin1, one-way ANOVA with Tukey's test; mean  $\pm$  SEM).
- D Intracellular endogenous A $\beta$ 40 in N2a cells treated with siBin1, siCD2AP or siControl, immunolabelled with anti-A $\beta$ 40, analysed by epifluorescence microscopy. Scale bar, 10  $\mu\text{m}$ . The quantification of A $\beta$ 40 intensity per cell is shown on the right ( $n = 3$ ,  $N_{\text{siControl}} = 268$ ,  $N_{\text{siBin1}} = 234$ ,  $N_{\text{siCD2AP}} = 257$ ; \*\*\*\* $P < 0.0001$  siBin1 vs. siControl,  $t$ -test, mean  $\pm$  SEM).
- E Endogenous APP and APP C-terminal fragments (APP-CTFs) levels by Western blot analysis with anti-APP antibody (Y188) of siBin1-, siCD2AP- or siControl-treated neurons upon DAPT treatment. The graph on the right shows the quantification of APP-CTFs normalised to APP ( $n = 4$ ; \*\* $P = 0.0057$  siBin1 vs. siControl,  $t$ -test, mean  $\pm$  SEM).
- F Endogenous nicastrin levels by Western blot analysis with anti-nicastrin antibody (PA1-758) and tubulin as a loading control in siBin1-, siCD2AP- or siControl-treated neurons. The quantification of nicastrin levels normalised to tubulin levels is shown on the right ( $n = 3$ , mean  $\pm$  SEM).

Source data are available online for this figure.

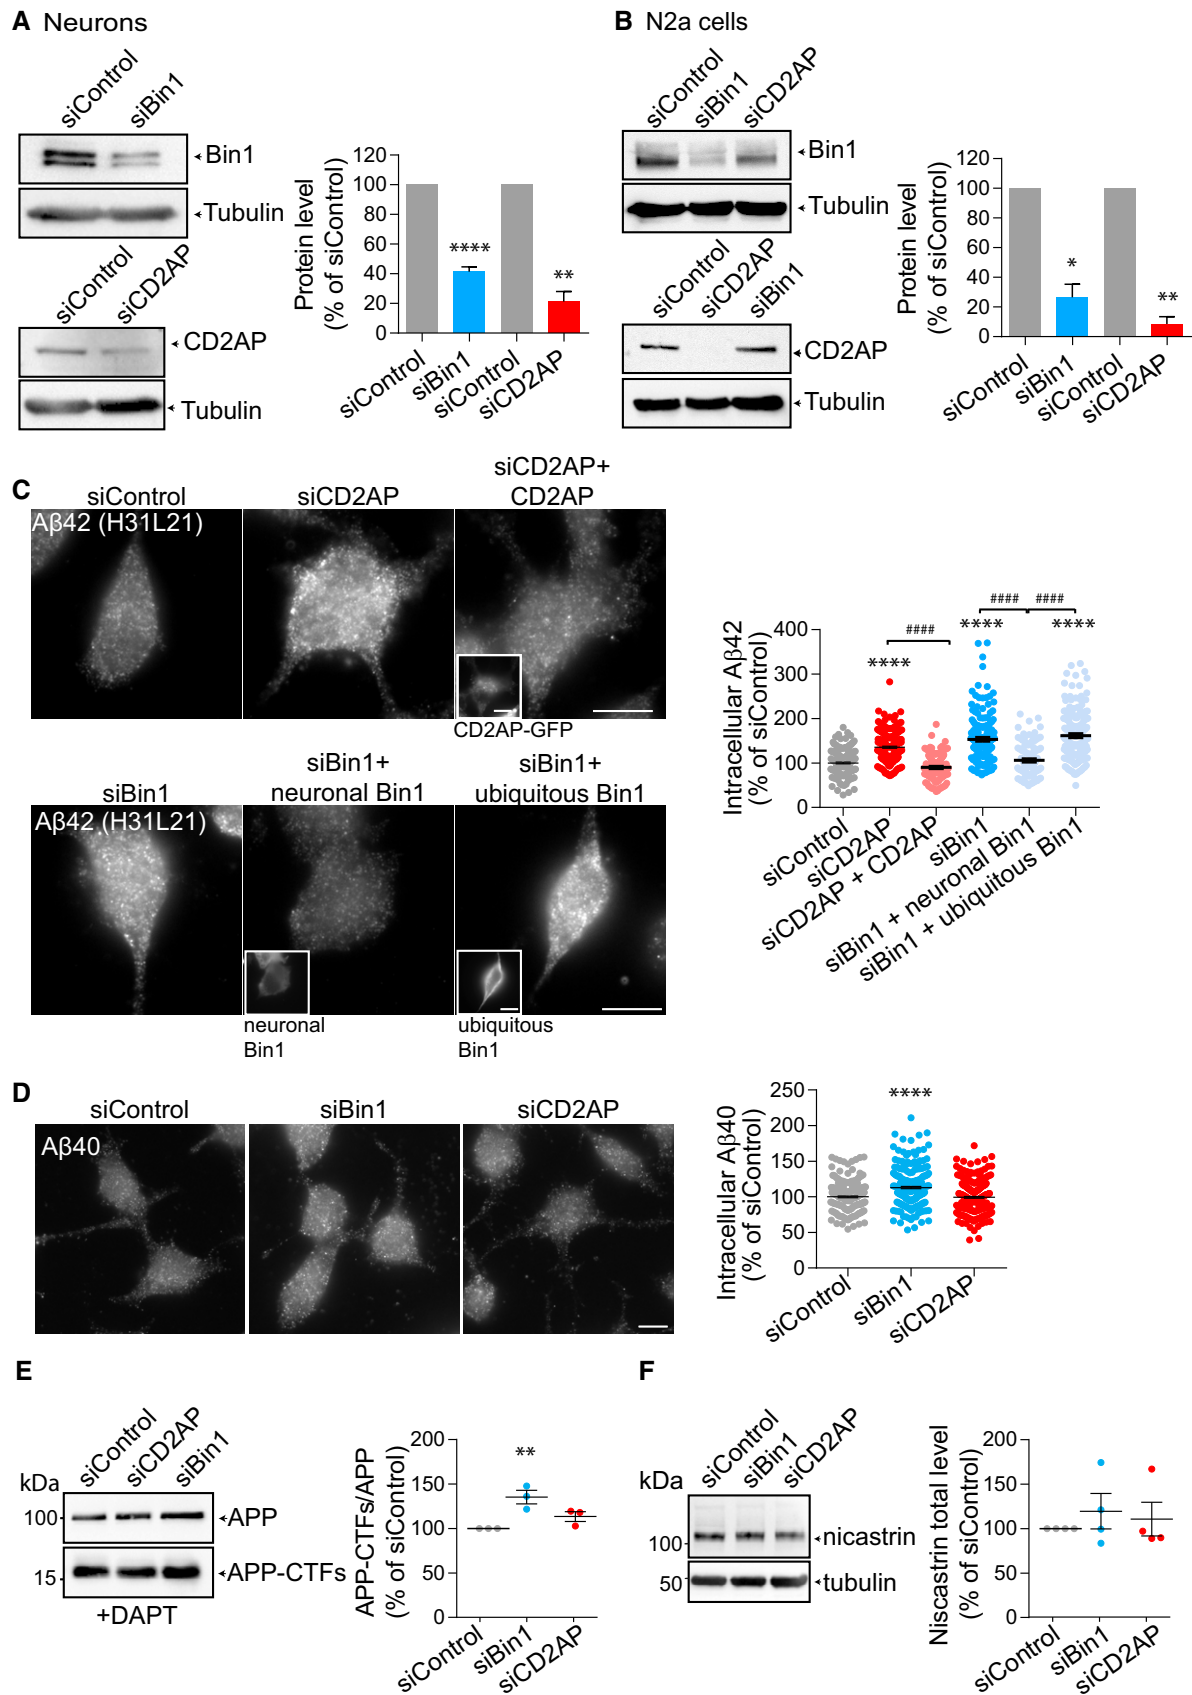

Figure EV2.

**Figure EV3. APP trafficking assays upon CD2AP and Bin1 depletion.**

N2a cells treated with siBin1, siCD2AP or siControl

- A Surface APP detected after a 4-min pulse with anti-N-terminal APP (22C11) and immunofluorescence of non-permeabilised N2a cells expressing APP-RFP (insets), analysed by epifluorescence microscopy. Scale bars, 10  $\mu$ m. The graph on the right shows the amount of cell surface APP fluorescence per cell quantified and normalised to APP-RFP fluorescence ( $n = 4$ ,  $N_{\text{siControl}} = 91$ ,  $N_{\text{siBin1}} = 49$ ,  $N_{\text{siCD2AP}} = 85$ ; mean  $\pm$  SEM).
- B Recycled APP detected with 22C11 at the plasma membrane of non-permeabilised cells expressing APP-RFP (insets), upon a 10-min pulse with 22C11, membrane acid stripping and 20-min chase, analysed by epifluorescence microscopy. Scale bars, 10  $\mu$ m. The graph on the right shows the amount of recycled APP fluorescence per cell quantified and normalised to APP-RFP fluorescence ( $n = 4$ ,  $N_{\text{siControl}} = 75$ ,  $N_{\text{siBin1}} = 61$ ,  $N_{\text{siCD2AP}} = 63$ ; mean  $\pm$  SEM).
- C Endocytosed APP detected with 22C11 upon 10-min pulse (left panels) and a 60-min chase (right panels) in DMSO- or leupeptin-treated N2a cells expressing APP-RFP (insets), analysed by epifluorescence microscopy. Scale bars, 10  $\mu$ m. The graph on the right shows APP degradation assessed by the decrease in the amount of endocytosed APP fluorescence at 60 min relative to time 0 (10-min pulse) in DMSO-treated cells normalised to APP-RFP fluorescence ( $n = 3$ ,  $N_{\text{DMSO 10 min}} = 111$ ,  $N_{\text{DMSO 60 min}} = 109$ ,  $N_{\text{Leu 10 min}} = 118$ ,  $N_{\text{Leu 60 min}} = 99$ , \*\*\*\* $P_{60 \text{ min}} < 0.0001$ ,  $t$ -test, mean  $\pm$  SEM).
- D APP levels by Western blot with anti-APP (Y188) of DMSO- or leupeptin-treated neurons at 11–12DIV. Quantification of APP levels normalised to tubulin levels is shown on the right ( $n = 3$ , \* $P = 0.0296$  leupeptin vs. DMSO,  $t$ -test, mean  $\pm$  SEM).
- E Non-degraded APP detected with 22C11 (10-min pulse and 60-min chase) in N2a cells expressing APP-RFP (left insets) treated with siCD2AP, siControl alone or upon expression of siRNA-resistant CD2AP-GFP (right insets), analysed by epifluorescence microscopy. Scale bars, 10  $\mu$ m. The amount of endocytosed APP fluorescence per cell quantified and normalised to APP-RFP fluorescence is shown on the right ( $n = 3$ ,  $N_{\text{siControl}} = 109$ ,  $N_{\text{siCD2AP}} = 82$ ,  $N_{\text{siCD2AP + CD2AP-GFP}} = 83$ ; \*\*\*\* $P < 0.0001$  siCD2AP vs. siControl, \*\*\*\* $P < 0.0001$  siCD2AP+CD2AP-GFP vs. siCD2AP, one-way ANOVA with Tukey's test, mean  $\pm$  SEM).

Source data are available online for this figure.

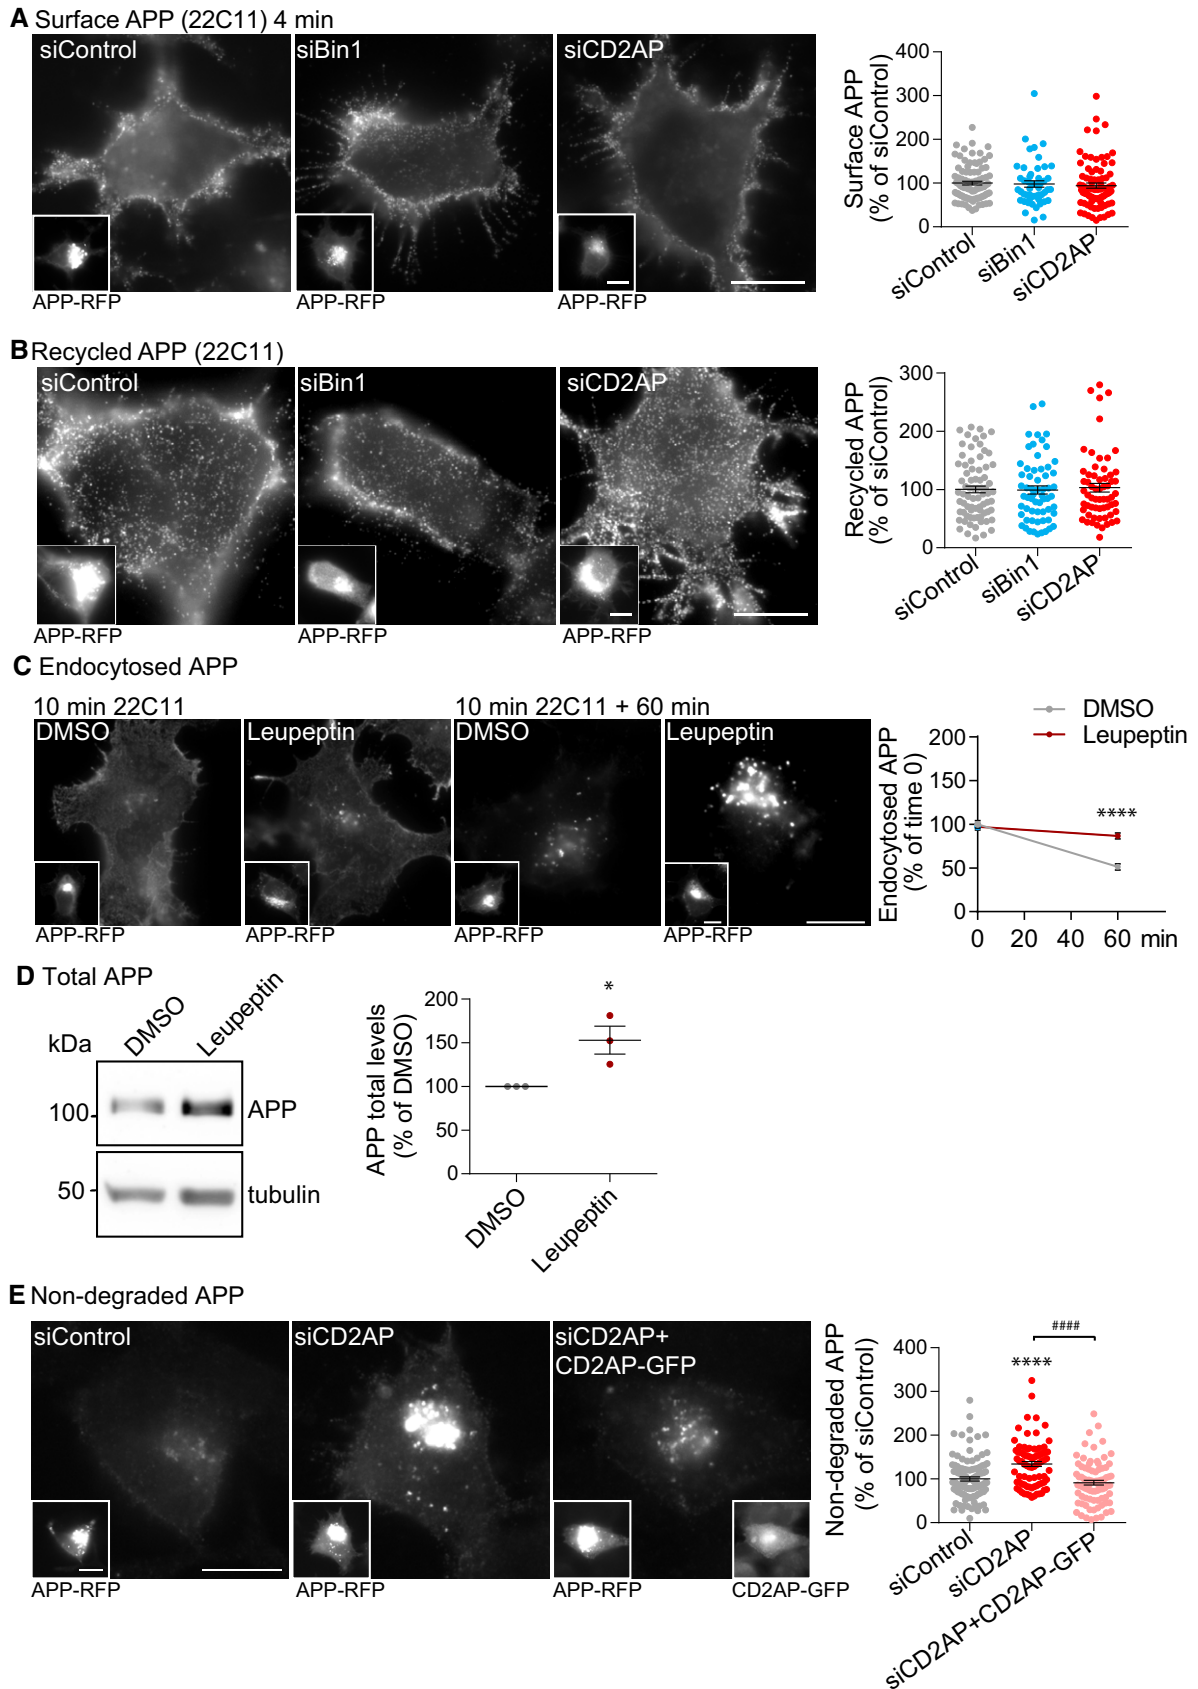

Figure EV3.

**Figure EV4. BACE1 trafficking assays upon CD2AP and Bin1 depletion.**

N2a cells treated with siBin1, siCD2AP or siControl

- A Surface BACE1 detected after a 4-min pulse with anti-FLAG (M1) and immunofluorescence of non-permeabilised cells expressing BACE1-GFP (insets), analysed by epifluorescence microscopy. Scale bars, 10  $\mu$ m. The graph on the right shows the amount of cell surface BACE1 fluorescence per cell quantified and normalised to BACE1-GFP fluorescence ( $n = 4$ ,  $N_{\text{siControl}} = 70$ ,  $N_{\text{siBin1}} = 43$ ,  $N_{\text{siCD2AP}} = 68$ ; mean  $\pm$  SEM).
- B Surface BACE1 detected as in (A) before and after acid stripping, analysed by epifluorescence microscopy. Scale bars, 10  $\mu$ m.
- C Endocytosed BACE1 detected with M1 (10-min pulse and 60-min chase) and BACE1-GFP (insets), analysed by epifluorescence microscopy. Scale bars, 10  $\mu$ m. The graph on the right shows the amount of endocytosed BACE1 fluorescence per cell quantified and normalised to BACE1-GFP fluorescence ( $n = 4$ ,  $N_{\text{siControl}} = 82$ ,  $N_{\text{siBin1}} = 72$ ,  $N_{\text{siCD2AP}} = 76$ ; mean  $\pm$  SEM).
- D Non-recycled BACE1 detected with M1 (10-min pulse, acid stripping and 20-min chase) in acid-stripped permeabilised N2a cells expressing BACE1-GFP (left insets) treated with siBin1 or siControl alone or upon expression of neuronal Bin1 or ubiquitous Bin1 (right insets), analysed by epifluorescence microscopy. Scale bars, 10  $\mu$ m. The graph on the right shows the amount of recycled BACE1 fluorescence per cell quantified and normalised to BACE1-GFP fluorescence ( $n = 3$ ,  $N_{\text{siControl}} = 95$ ,  $N_{\text{siBin1}} = 120$ ,  $N_{\text{siBin1} + \text{neuronal Bin1}} = 99$ ,  $N_{\text{siBin1} + \text{ubiquitous Bin1}} = 89$ ; \*\*\*\* $P < 0.0001$  siBin1 vs. siControl and siBin1 + ubiquitous Bin1 vs. siControl, \*\*\*\* $P < 0.0001$  siBin1 vs. siBin1 + neuronal Bin1 and siBin1 + ubiquitous Bin1 vs. siBin1 + neuronal Bin1, one-way ANOVA with Tukey's test; mean  $\pm$  SEM).
- E Endogenous BACE1 levels by Western blot analysis with anti-BACE1 antibody and tubulin as a loading control in siBin1-, siCD2AP- or siControl-treated neurons. Quantification of BACE1 levels normalised to tubulin levels is shown on the right ( $n = 5$ , mean  $\pm$  SEM).

Source data are available online for this figure.

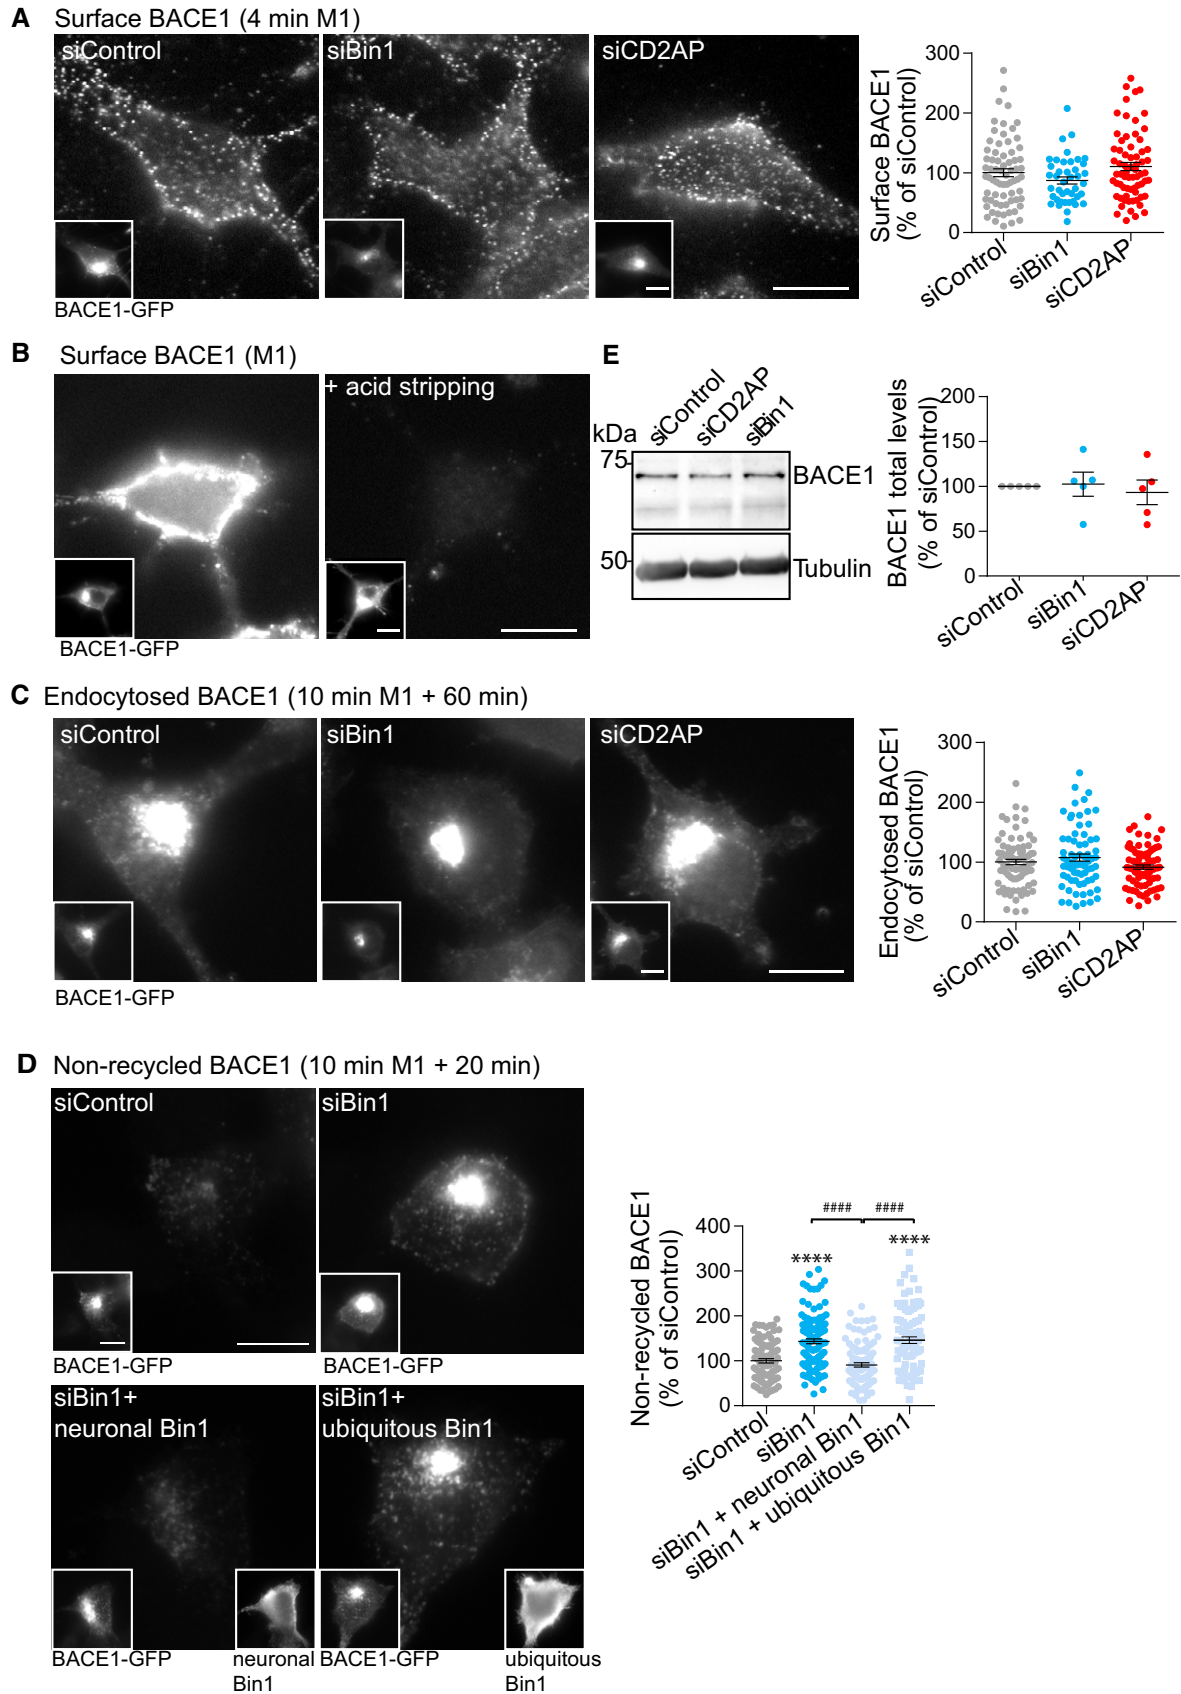

**Figure EV5. CD2AP and Bin1 localisation, BACE1 and APP endocytosis and early endosomes alterations upon knockdown of Bin1 and CD2AP.**

- A CD2AP localisation in neurons immunolabelled at 21 DIV with anti-CD2AP (green), anti-AnkG (magenta) and anti-MAP2 (blue) to identify dendrites (shown in magnified dendrites), analysed by epifluorescence microscopy. The white rectangle indicates the magnified dendrite shown in the bottom panels. Scale bars, 10  $\mu$ m.
- B Bin1 localisation in neurons immunolabelled at 21 DIV with anti-Bin1 (green) and anti-AnkG (magenta) to identify axons, analysed by epifluorescence microscopy. The white rectangle indicates the magnified axon shown in the lower panels. Scale bars, 10  $\mu$ m.
- C The axon/dendrite ratio of Bin1 and CD2AP calculated to quantify polarisation is shown ( $N_{CD2AP} = 23$ ,  $N_{Bin1} = 25$ ; \*\*\*\* $P < 0.0001$ ,  $t$ -test; mean  $\pm$  SEM).
- D–E BACE1 endocytosis detected with M1 in siBin1- and siControl-treated neurons expressing BACE1-GFP N-terminally tagged with FLAG, analysed by epifluorescence microscopy. (D) Endocytosed BACE1 (top panels) detected with M1 (5-min pulse) and BACE1-GFP (bottom panels). Arrowheads identify axons (Ax) and dendrites (Dd) magnified on the right. Scale bars, 10  $\mu$ m. (E) The amount of endocytosed BACE1 per cell body, dendrite and axons was normalised to BACE1-GFP fluorescence in the cell body and quantified as percentage of siControl ( $n = 3$ ,  $N_{siControl} = 14$ ,  $N_{siBin1} = 14$ ; mean  $\pm$  SEM).
- F Endocytosed APP (green) detected with 22C11 (60-min chase) in EEA1-positive early endosomes (magenta) in siCD2AP- and siControl-treated N2a cells expressing APP-RFP, analysed by spinning-disc confocal microscopy. Scale bar, 10  $\mu$ m. The white squares are magnified on the right. Scale bar, 1  $\mu$ m.
- G The quantification of colocalisation between endocytosed APP and EEA1 is shown ( $n = 3$ ,  $N_{siControl} = 21$ ,  $N_{siCD2AP} = 21$ ; \*\*\*\* $P < 0.001$ ,  $t$ -test, mean  $\pm$  SEM).
- H Non-recycled BACE1 (green) detected with M1 (15-min pulse, acid stripping and 20-min chase) in EEA1-positive early endosomes (magenta) in siControl- and siBin1-treated N2a cells expressing BACE1-GFP, analysed by spinning-disc confocal microscopy. Scale bar, 10  $\mu$ m. The white squares indicate EEA1-positive endosomes magnified on the right. Scale bar, 1  $\mu$ m.
- I Quantification of colocalisation between non-recycled BACE1 and EEA1 is shown ( $n = 3$ ,  $N_{siControl} = 26$ ,  $N_{siBin1} = 26$ ; \*\*\*\* $P < 0.001$ ,  $t$ -test, mean  $\pm$  SEM).
- J Early endosomes immunolabelled with anti-EEA1 in siCD2AP- and siControl-treated neurons analysed by epifluorescence microscopy. Scale bars, 10  $\mu$ m. The quantification of the average area of EEA1-positive early endosomes in dendrites is shown on the right ( $n = 4$ ,  $N_{siControl} = 34$ ,  $N_{siCD2AP} = 28$ ; \*\*\*\* $P < 0.0001$ ,  $t$ -test, mean  $\pm$  SEM).
- K Rab5-positive early endosomes detected in siBin1- and siControl-treated neurons expressing Rab5-GFP, analysed by spinning-disc confocal microscopy. Scale bars, 10  $\mu$ m. The quantification of the average area of Rab5-positive early endosomes in axons is shown on the right ( $n = 3$ ,  $N_{siControl} = 14$ ,  $N_{siBin1} = 19$ ; \*\*\*\* $P < 0.001$ ,  $t$ -test, mean  $\pm$  SEM).



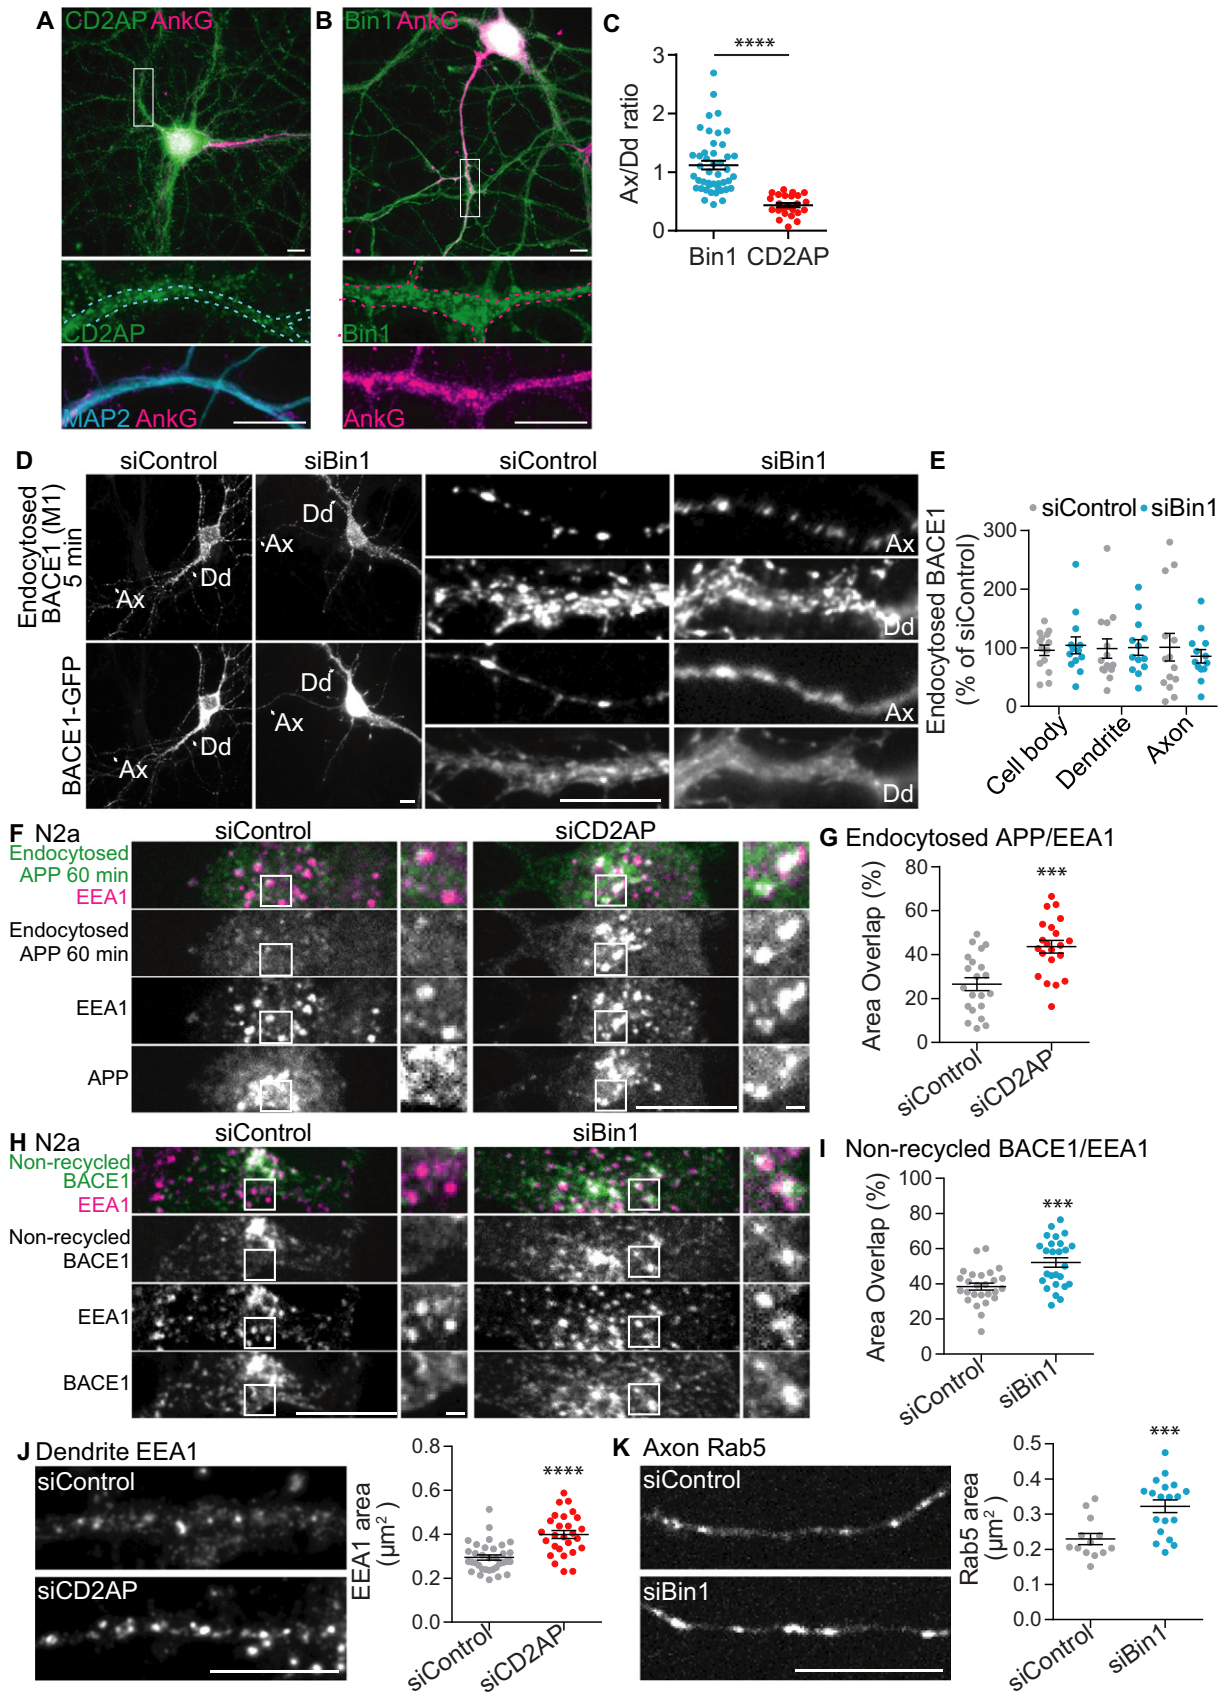

Supplement: EMBR-18-102-s002.pdf [file EMBR-18-102-s002.pdf]
