# Supplementary material
Source: PubMed Central journal article supplement (PMC5210085)
Supplement: EMBR-18-102-s001.pdf [file EMBR-18-102-s001.pdf]

**A Dendrite**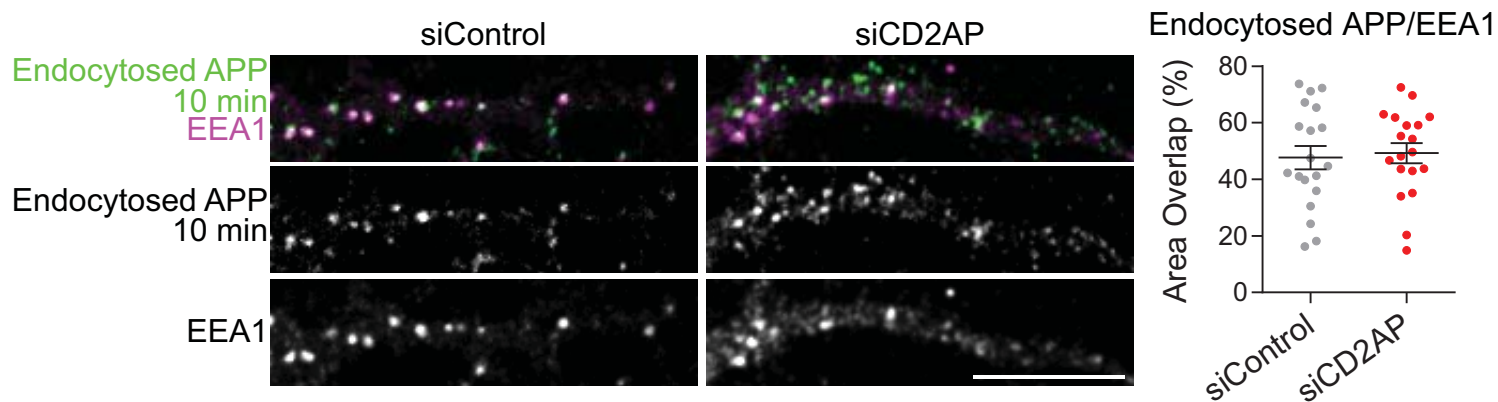**B Dendrite**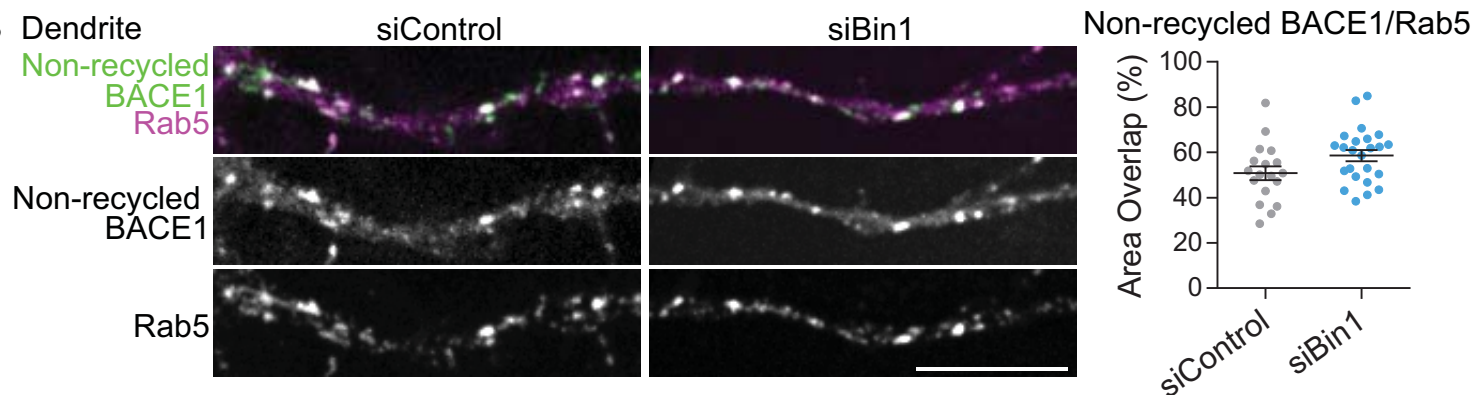

**Appendix Figure S1** Early endosomal localisation of endocytosed APP (10 min) and non-recycled BACE1 in neurons.

(A) Endocytosed APP (green) detected with 22C11 (10 min pulse) in EEA1-positive early endosomes (magenta) in dendrites of siCD2AP- and siControl-treated neurons expressing APP-RFP, analysed by spinning-disk confocal microscopy. Scale bar, 10  $\mu$ m. Quantification of colocalisation between endocytosed APP and EEA1 in dendrites is shown below ( $n=3$ ,  $N_{\text{siControl}}=19$ ,  $N_{\text{siCD2AP}}=20$ , mean  $\pm$  SEM).

(B) Non-recycled BACE1 (green) detected with M1 (15 min pulse, acid stripping and 20 min chase) in Rab5-positive early endosomes (magenta) in dendrites of siBin1- and siControl-treated neurons expressing Rab5-mCherry and BACE1-GFP analysed by spinning-disk confocal microscopy. Scale bar, 10  $\mu$ m. Quantification of colocalisation between non-recycled BACE1 and Rab5 in dendrites is shown below ( $n=3$ ,  $N_{\text{siControl}}=18$ ,  $N_{\text{siBin1}}=24$ ; mean  $\pm$  SEM).
