# Supplementary material
Source: PubMed Central journal article supplement (PMC5210085)

Fig. 1F

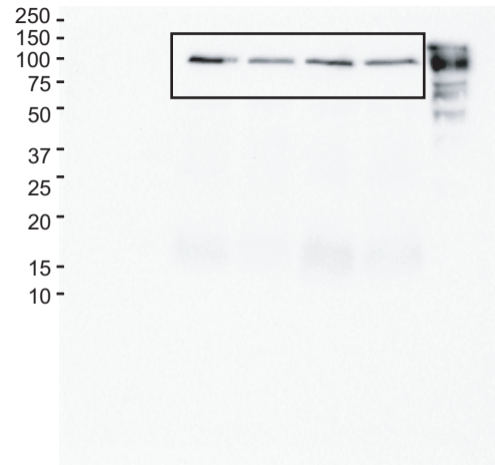

WB: APP (Y188)

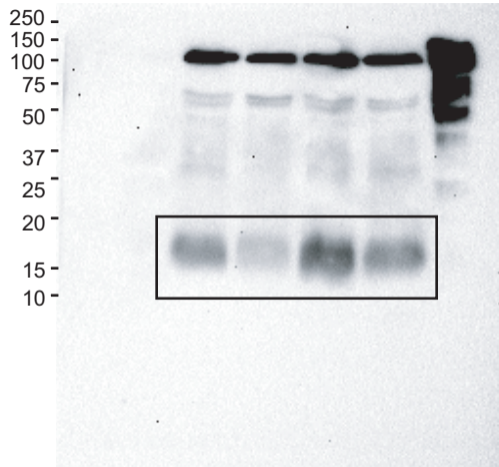

higher exposure

Supplement: EMBR-18-102-s003.pdf [file EMBR-18-102-s003.pdf]

Fig.3E

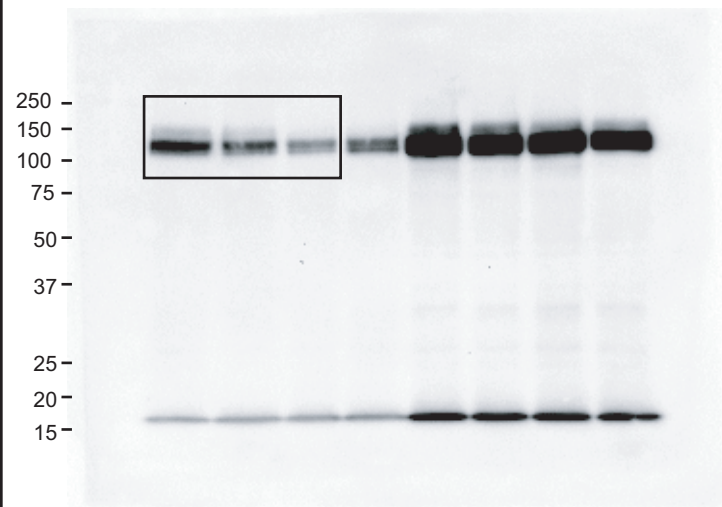

WB: APP (Y188)

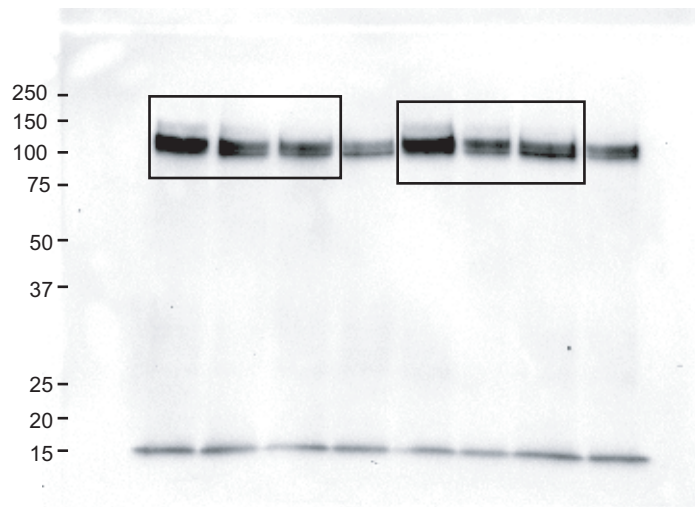

WB: APP (Y188)

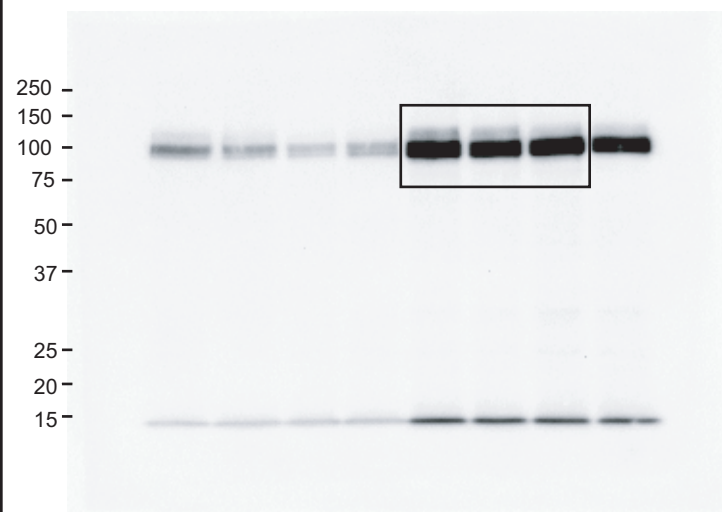

WB: APP (Y188)

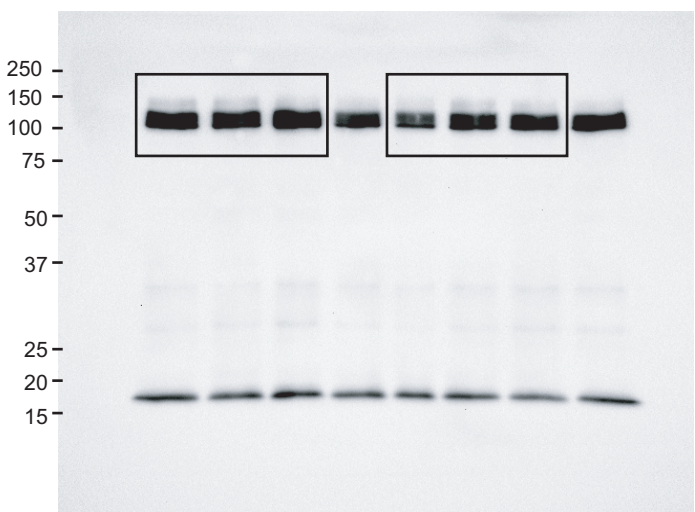

WB: APP (Y188)

Supplement: EMBR-18-102-s004.pdf [file EMBR-18-102-s004.pdf]
